# Supplementary material for: Electrochemical properties of Li2MnO3 nanocrystals synthesized using a hydrothermal method
Source: Royal Society of Chemistry journal article supplement (doi:10.1039/c5ra08387g), 2015-01-01
Supplement: c5ra08387g1.pdf [file c5ra08387g1.pdf]

## Electronic Supplementary Information

### Mn valence calculation of the precursor in the $S_0$ sample

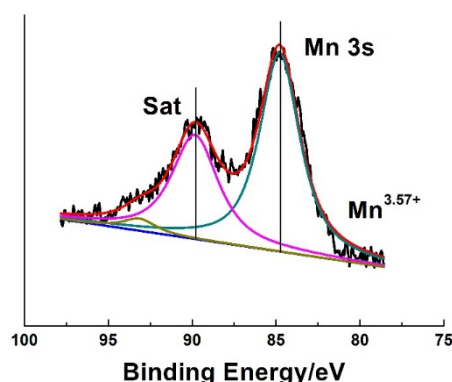

Fig. S1 the XPS Mn 3s region of the precursor in the  $S_0$  sample.

Splitting of transition metal 3s XPS spectrum occurred due to exchange coupling between the 3s hole and 3d electrons. The difference in binding energy between the Mn 3s peak and its' satellite peak ( $\Delta E$ ) was used to approximate the average Mn oxidation state (AOS) by the equation,  $AOS = 8.956 - 1.126 \Delta E$ .<sup>[27]</sup> Thus the calculated average Mn oxidation state of the precursor was +3.57.

### Comparison experiment without $(NH_4)_2S_2O_8$

$KMnO_4$  and  $MnSO_4$  were dissolved at a molar ratio of 0.3:0.7, 0.35:0.65, 0.4:0.6 and 0.45:0.55 in 10 mL of deionized water in a Teflon liner to obtain a mixed solution. Afterward, 20 mL LiOH solution (3 mol/L) was trickled into the mixture, which was stirred for 30 min to yield a precursor precipitate. The Teflon liner was transferred to an autoclave and maintained at 200 °C for 24 h. The as-prepared powders were filtered, washed, and dried at 80 °C for 24 h. The obtained samples were referred to as  $C_1$ ,  $C_2$ ,  $C_3$ , and  $C_4$ , respectively, in which the Mn valence of the precursor were 3.5, 3.75, 4.0 and 4.25.

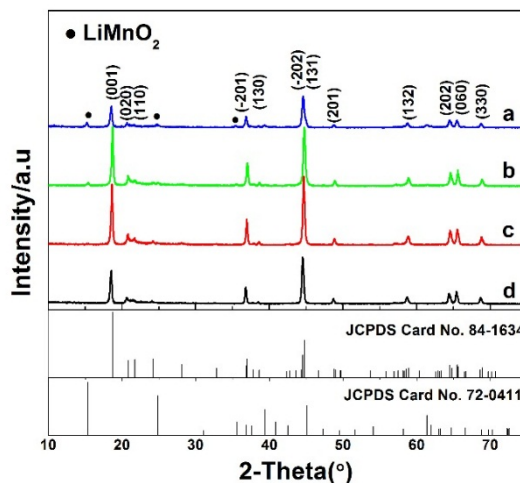

Fig. S2 the XRD patterns of the samples, (a) for C<sub>1</sub>, (b) for C<sub>2</sub>, (c) for C<sub>3</sub> and (d) for C<sub>4</sub>.

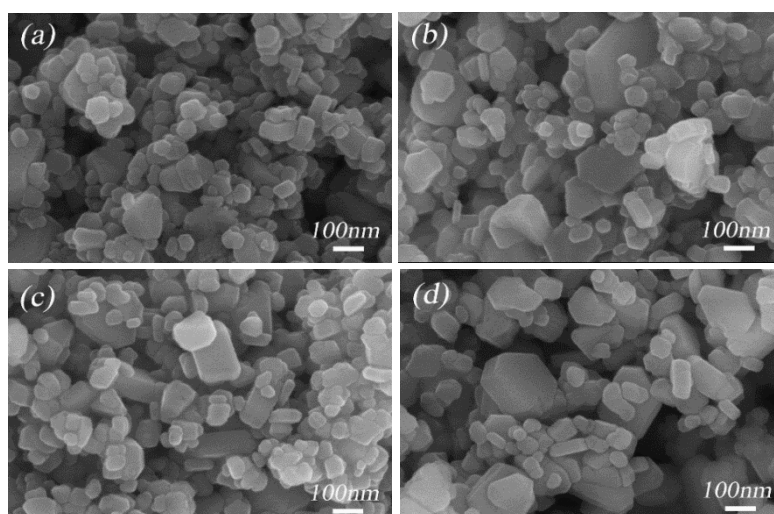

Fig. S3 SEM images of the samples, (a) for C<sub>1</sub>, (b) for C<sub>2</sub>, (c) for C<sub>3</sub> and (d) for C<sub>4</sub>.

The phase compositions of the products without (NH<sub>4</sub>)<sub>2</sub>S<sub>2</sub>O<sub>8</sub> were analyzed by XRD (Fig. S2). While the Mn valence varied from +3.5 to +4, a main phase of Li<sub>2</sub>MnO<sub>3</sub> with small amounts of O-LiMnO<sub>2</sub> was observed. Furthermore the increasing Mn valence led to less LiMnO<sub>2</sub>. The XRD patterns of the samples showed a single Li<sub>2</sub>MnO<sub>3</sub> phase when the Mn valence exceeded +4. These results indicated that the precursor changed without (NH<sub>4</sub>)<sub>2</sub>S<sub>2</sub>O<sub>8</sub>, as the poor oxidizing ability of KMnO<sub>4</sub> in alkaline solution. Thus, the addition of (NH<sub>4</sub>)<sub>2</sub>S<sub>2</sub>O<sub>8</sub> was significant for oxidizing the precursor.

The morphologies of the products of C<sub>1</sub>-C<sub>4</sub> were observed by SEM in Fig. S3. All the samples showed bulk shape with 50nm particles and larger particles with 200-300nm size. Furthermore the grain sizes did not show obvious change while the average Mn valence of the precursor varied from 3.5 to 4.25. It referred to the change of the precursor without (NH<sub>4</sub>)<sub>2</sub>S<sub>2</sub>O<sub>8</sub>. MnSO<sub>4</sub> could not be oxidized completely to δ-MnO<sub>2</sub> by KMnO<sub>4</sub>. The synthesis process was more complex and hardly controlled.

### The second charge/discharge curves of the S<sub>6</sub>-S<sub>20</sub> samples

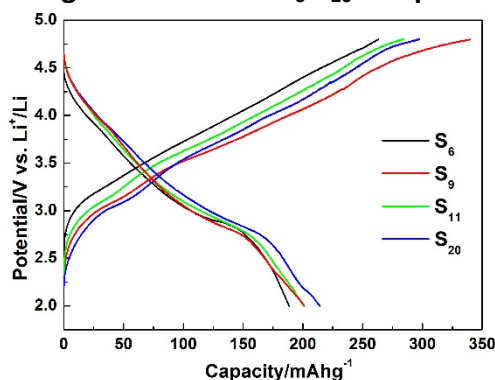

Fig. S4 the second charge and discharge curves of the S<sub>6</sub>-S<sub>20</sub> samples.

### The cycle performance of S<sub>6</sub>-S<sub>20</sub> samples

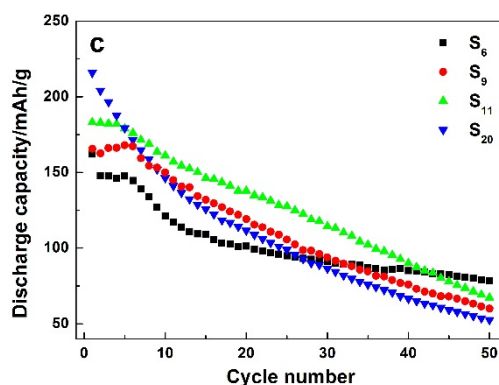

Fig. S5 the cycle performance at 100mAh/g of the S<sub>6</sub>, S<sub>9</sub>, S<sub>11</sub> and S<sub>20</sub> samples.

Fig. S5 demonstrated the cycle performance of S<sub>6</sub>, S<sub>9</sub>, S<sub>11</sub>, and S<sub>20</sub> at a rate of 100 mA/g (1st-50th). The first discharge capacities were 162, 166, 183, and 210 mAh/g, while the capacity retentions were 48.5%, 36.1%, 36.7% and 25% after 50 cycles for S<sub>6</sub>, S<sub>9</sub>, S<sub>11</sub>, and S<sub>20</sub>, respectively. S<sub>6</sub> capacity demonstrated a fast fade during the 5th -15th cycles, followed by a slow and linear fade after the 16<sup>th</sup> cycle. The capacities of S<sub>9</sub> and S<sub>11</sub> showed linear fade after the 5th cycle. On the contrary, nearly logarithmic decrease of the discharge capacity was observed in S<sub>20</sub> samples. The poor cycling stability in S<sub>9</sub>-S<sub>20</sub> samples might arise from the interfacial reactions and electrolyte erosion. In summary, decreasing grain sizes led to larger initial discharge capacities and lower capacity retentions after 50 cycles.

### CV curves of S<sub>6</sub>-S<sub>20</sub> samples

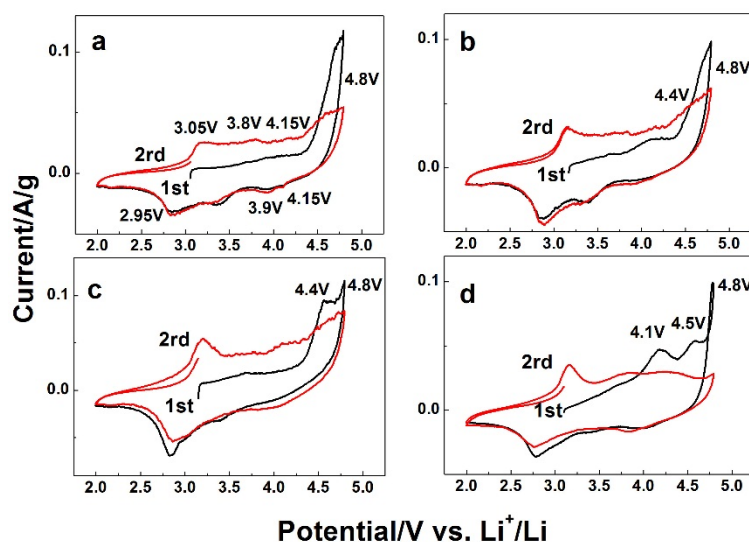

Fig. S6 Cyclic voltammograms (0.1 mV/s, 2-4.8V) of the first and second cycle, (a) for S<sub>6</sub>, (b) for S<sub>9</sub>, (c) for S<sub>11</sub> and (d) for S<sub>20</sub>.

CV measurements were carried out for  $S_6$ - $S_{20}$  samples. As plotted in Figure S6,  $S_6$ ,  $S_9$ ,  $S_{11}$  and  $S_{20}$  showed different oxidation peaks in the initial cycle. In  $S_6$  and  $S_9$  samples,  $\text{Li}_2\text{O}$ -extraction peak overlapped with the 4.8V peak which arose from the interfacial reaction. A distinct oxidation peak appeared at  $\sim 4.4$  V in  $S_{11}$  samples. By contrast,  $S_{20}$  demonstrated two peaks at 4.1 and 4.5 V. These results showed that  $\text{Li}_2\text{O}$ -extraction peaks shifted to lower voltages with decreasing sample size. The oxidation peak positions mainly consistent with the  $dQ/dV$  curves in the manuscript.

The curves of all samples were similar to each other in the second charge/discharge. As presented in Fig. S6, a distinct oxidation peak appeared at  $\sim 3.05$ V, whereas a reduction peak was observed at  $\sim 2.95$ V. Two weak oxidation peaks at  $\sim 3.8$ V and 4.15V implied the existence of spinel phase with corresponding reduction peaks at  $\sim 3.9$ V and 4.15V. CV curves demonstrated a similar conclusion with the  $dQ/dV$  curves in the manuscript. The minor difference with  $dQ/dV$  curves arose from different charging and discharging method.
